# Supplementary material for: Effects of spirulina and wakame consumption on intestinal cholesterol absorption and serum lipid concentrations in non-hypercholesterolemic adult men and women
Source: Springer Nature journal article supplement (doi:10.1007/s00394-019-02073-7), 2019-08-06
Supplement: MOESM1 [file 17043144]

**Effects of spirulina and wakame consumption on intestinal cholesterol absorption and serum lipid concentrations in non-hypercholesterolemic men and women**

**- Supplemental Materials -**

José J van den Driessche, Jogchum Plat, Maurice Konings, Ronald P Mensink

Department of Nutrition and Movement Sciences, NUTRIM School for Nutrition and Translational Research in Metabolism, Maastricht University Medical Center+ (MUMC+), Maastricht, the Netherlands.

Corresponding author:

Ms. José J. van den Driessche

Email: [j.vandendriessche@maastrichtuniversity.nl](mailto:j.vandendriessche@maastrichtuniversity.nl)

## SUPPLEMENTAL TABLES

**Supplemental table 1:** Sterol composition of the spirulina and wakame supplements as determined by gas-chromatography flame-ionization-detection (GC-FID) by Bonn University

|                       | Spirulina |        | Wakame |        |
|-----------------------|-----------|--------|--------|--------|
|                       | ng/mg     | µg/day | ng/mg  | µg/day |
| Cholesterol           | 7.8       | 37.4   | -      | -      |
| 24-methyl cholesterol | 7.7       | 37.0   | 65.1   | 312.5  |
| Campesterol           | 4.9       | 23.5   | -      | -      |
| Sitosterol            | 19.3      | 92.6   | -      | -      |
| Stigmasterol          | 11.5      | 55.2   | -      | -      |
| Fucosterol            | -         |        | 476.6  | 2287.7 |
| 24 R/S saringosterol  | -         |        | 17.4   | 83.5   |

**Supplemental table 2:** Lipid concentrations after spirulina, wakame and placebo intake in the 50% highest absorbers (N = 17) and the 50% lowest absorbers (N = 18)

|                                       | Highest cholesterol absorbers |             |             |                | Lowest cholesterol absorbers |             |             |                |
|---------------------------------------|-------------------------------|-------------|-------------|----------------|------------------------------|-------------|-------------|----------------|
|                                       | Spirulina                     | Wakame      | Placebo     | P <sup>a</sup> | Spirulina                    | Wakame      | Placebo     | P <sup>a</sup> |
| Total cholesterol (mmol/L)            | 4.28 ± 0.76                   | 4.42 ± 0.89 | 4.48 ± 0.84 | 0.269          | 5.13 ± 1.04                  | 5.24 ± 1.02 | 5.11 ± 1.26 | 0.645          |
| LDL cholesterol (mmol/L) <sup>b</sup> | 2.24 ± 0.57                   | 2.33 ± 0.75 | 2.34 ± 0.73 | 0.575          | 3.26 ± 0.83                  | 3.24 ± 0.92 | 3.21 ± 1.01 | 0.871          |
| HDL cholesterol (mmol/L)              | 1.65 ± 0.42                   | 1.65 ± 0.43 | 1.72 ± 0.51 | 0.429          | 1.43 ± 0.39                  | 1.52 ± 0.36 | 1.42 ± 0.41 | 0.119          |
| Triacylglycerol (mmol/L)              | 0.86 ± 0.34                   | 0.96 ± 0.46 | 0.93 ± 0.35 | 0.422          | 1.16 ± 0.46                  | 1.07 ± 0.48 | 1.03 ± 0.39 | 0.488          |

<sup>a</sup> P-value for the treatment effect

<sup>b</sup> N = 17 in the 'lowest cholesterol absorbers' for LDL cholesterol
